# Supplementary material for: Enhanced ER protein processing gene expression increases rAAV yield and full capsid ratio in HEK293 cells
Source: PubMed Central journal article supplement — Appl Microbiol Biotechnol. 2024 Sep 4;108(1):459. doi: 10.1007/s00253-024-13281-5 (PMC11374875; doi:10.1007/s00253-024-13281-5), 2024-09-04
Supplement: 253_2024_13281_MOESM1_ESM.pdf [file 253_2024_13281_MOESM1_ESM.pdf]

### Enhanced ER Protein Processing Gene Expression Increases rAAV Yield and Full Capsid Ratio in HEK293 Cells

Qiang Fu<sup>1\*</sup>, Yongdan Wang<sup>2\*</sup>, Jiansong Qin<sup>1</sup>, Dongming Xie<sup>2</sup>, David McNally<sup>2,3</sup>, Seongkyu Yoon<sup>1,2†</sup>

1. Department of Biomedical Engineering and Biotechnology, University of Massachusetts Lowell, Lowell, MA 01854, United States
2. Department of Chemical Engineering, University of Massachusetts Lowell, Lowell, MA 01854, United States
3. MassBiologics, University of Massachusetts Chan Medical School, Mattapan, MA 02126, United States

\* Fu and Wang equally contributed to this paper.

† Corresponding author. Correspondence should be addressed to Seongkyu Yoon / 1 University Ave, Lowell, MA 01854 / Email: [seongkyu\\_yoon@uml.edu](mailto:seongkyu_yoon@uml.edu);

**Supplementary Table S1.** Plasmid information.

| Plasmid name                     | Description                                                                       |
|----------------------------------|-----------------------------------------------------------------------------------|
| pU6-(BbsI)_CBh-Cas9-T2A-mCherry  | Backbone of sgRNA-Cas9 vectors (Addgene plasmid #64324, Watertown, United States) |
| <i>AAVSI</i> -sgRNA-Cas9         | sgRNA targeting <i>AAVSI</i> locus and Cas9 expression vector                     |
| <i>AAVSI</i> - <i>eGFP</i> donor | Donor plasmid targeting <i>AAVSI</i> locus (GOI: <i>eGFP</i> )                    |
| <i>AAVSI</i> - <i>BCL2</i> donor | Donor plasmid targeting <i>AAVSI</i> locus (GOI: <i>BCL2</i> )                    |
| <i>AAVSI</i> - <i>XBPI</i> donor | Donor plasmid targeting <i>AAVSI</i> locus (GOI: <i>XBPI</i> )                    |

|                                                          |                                                                                                                         |
|----------------------------------------------------------|-------------------------------------------------------------------------------------------------------------------------|
| <i>AAVSI-HSPA6</i> donor                                 | Donor plasmid targeting <i>AAVSI</i> locus (GOI: <i>HSPA6</i> )                                                         |
| <i>AAVSI-GADD34</i> donor                                | Donor plasmid targeting <i>AAVSI</i> locus (GOI: <i>GADD34</i> )                                                        |
| pAdDeltaF6                                               | Plasmid contains helper genes E2, E4 and VARNA for rAAV production (Addgene plasmid #112867, Watertown, United States)  |
| pAAV2/2                                                  | Plasmid contains Rep and Cap genes for AAV2 production (Addgene plasmid #104963, Watertown, United States)              |
| pAAV2/8                                                  | Plasmid contains Rep and Cap genes for AAV8 production (Addgene plasmid #112864, Watertown, United States)              |
| AAV-CMV- <i>GFP</i>                                      | Plasmid contains CMV- <i>GFP</i> flanked by ITRs for rAAV production (Addgene plasmid #67634, Watertown, United States) |
| <b>Plasmid name (PCR template)</b>                       | <b>Elements</b>                                                                                                         |
| <i>AAVSI-eGFP</i> donor                                  | <i>AAVSI</i> backbone, including: homology arms, <i>puromycin</i> resistance gene, CMV promoter, SV40 poly(A)           |
| pMSCV <i>puro-BCL2</i>                                   | <i>BCL2</i> gene, (Addgene plasmid #191964, Watertown, United States)                                                   |
| pcDNA5/FRT/TO <i>GFP HSPA6</i>                           | <i>HSPA6</i> gene, (Addgene plasmid #19486, Watertown, United States)                                                   |
| pcDNA3.1+/C-(K)DYK <i>XBPI</i> (NM_005080) ORF Clone     | <i>XBPI</i> gene, (Genscript, OHU26371D, Piscataway, United States)                                                     |
| pcDNA3.1+/C-(K)DYK <i>PPP1R15A</i> (NM_014330) ORF Clone | <i>GADD34</i> gene, (Genscript, OHU17374D, Piscataway, United States)                                                   |

**Supplementary Table S2.** Primer information.

| Primer name            | Description                         | Sequence (5'-3')          |
|------------------------|-------------------------------------|---------------------------|
| <i>AAVSI</i> sgRNA fwd | Sense oligo for <i>AAVSI</i> -sgRNA | CACCGACCCCACAGTGGGGCCACTA |

|                                 |                                                 |                                 |
|---------------------------------|-------------------------------------------------|---------------------------------|
| <i>AAVS1</i> sgRNA rev          | Antisense oligo for <i>AAVS1</i> -sgRNA         | AAACTAGTGGCCCCACTGTGGGGTC       |
| <i>AAVS1</i> donor backbone fwd | Sense oligo for <i>AAVS1</i> donor backbone     | GGGATCCACCGGATCTAGATAACT        |
| <i>AAVS1</i> donor backbone rev | Antisense oligo for <i>AAVS1</i> donor backbone | GGCGGTTTCACTAAACCAGCTCTGCT<br>T |
| <i>XBPI</i> fwd                 | Sense oligo for <i>XBPI</i>                     | ACCGCCATGGTGGTGGTGGCAGCCG       |
| <i>XBPI</i> rev                 | Antisense oligo for <i>XBPI</i>                 | TTAGTTCATTAATGGCTTCCAGCT        |
| <i>GADD34</i> fwd               | Sense oligo for <i>GADD34</i>                   | ACCGCCATGGCCCCAGGCCAAGCAC       |
| <i>GADD34</i> rev               | Antisense oligo for <i>GADD34</i>               | TCAGCCACGCCTCCCCTGA             |
| <i>BCL2</i> fwd                 | Sense oligo for <i>BCL2</i>                     | GCCACCATGGCGCACGCTGGGAGA        |
| <i>BCL2</i> rev                 | Antisense oligo for <i>BCL2</i>                 | TCACTTGTGGCCAGATAGGC            |
| <i>HSPA6</i> fwd                | Sense oligo for <i>HSPA6</i>                    | GCCACCATGCAGGCCCCACGGGAG        |
| <i>HSPA6</i> rev                | Antisense oligo for <i>HSPA6</i>                | TCAATCAACCTCCTCAATGA            |
| <i>BCL2</i> 3' junction fwd     | <i>AAVS1</i> amplicon for 3' junction PCR       | GTTTGATTTCTCCTGGCTGTCTCT        |
| <i>HSPA6</i> 3' junction fwd    | <i>AAVS1</i> amplicon for 3' junction PCR       | AATGCAAGACAAGTGTCGGGAAG         |
| <i>GADD34</i> 3' junction fwd   | <i>AAVS1</i> amplicon for 3' junction PCR       | ACTGTCCATTTCTCCTGGCTGTCT        |
| <i>XBPI</i> 3' junction fwd     | <i>AAVS1</i> amplicon for 3' junction PCR       | TGAGAACCAGGAGTTAAGACAGCG        |
| <i>AAVS1</i> 3' junction rev    | <i>AAVS1</i> amplicon for 3' junction PCR       | CCAGCCTCACCAAGTGGTTCATAA        |

|                             |                                           |                          |
|-----------------------------|-------------------------------------------|--------------------------|
| <i>AAVSI</i> 5'junction fwd | <i>AAVSI</i> amplicon for 5' junction PCR | TACTCTCTTCGATTGGAGTCGCTT |
| <i>puro</i> 5' junction rev | <i>AAVSI</i> amplicon for 5' junction PCR | CGCGTGAGGAAGAGTTCTTGCA   |
| <i>XBPI</i> qPCR fwd        | <i>XBPI</i> amplicon for qRT- PCR         | GCTGGAACAGCAAGTGGTAG     |
| <i>XBPI</i> qPCR rev        | <i>XBPI</i> amplicon for qRT- PCR         | CCACTGGCCTCACTTCATT      |
| <i>BCL2</i> qPCR fwd        | <i>BCL2</i> amplicon for qRT- PCR         | AGGATTGTGGCCTTCTTTGA     |
| <i>BCL2</i> qPCR rev        | <i>BCL2</i> amplicon for qRT- PCR         | ACAGTTCCACAAAGGCATCC     |
| <i>HSPA6</i> fwd            | <i>HSPA6</i> amplicon for qRT- PCR        | CACCAAGCAGACCCAGACTT     |
| <i>HSPA6</i> rev            | <i>HSPA6</i> amplicon for qRT- PCR        | CACTGAGTTCAAAACGCCCC     |
| <i>GADD34</i> fwd           | <i>GADD34</i> amplicon for qRT- PCR       | CTGGCTGGTGGGAAGCAGTAA    |
| <i>GADD34</i> rev           | <i>GADD34</i> amplicon for qRT- PCR       | TATGGGGGATTGCCAGAGGA     |
| <i>GAPDH</i> fwd            | <i>GAPDH</i> amplicon for qRT- PCR        | CCCACCACACTGAATCTCCC     |
| <i>GAPDH</i> rev            | <i>GAPDH</i> amplicon for qRT- PCR        | TACATGACAAGGTGCGGCTC     |

**Supplementary Table S3.** Transfection parameters for low-producing condition

| <b>6 well plate transfection conditions<br/>(low producing condition)</b> |          |
|---------------------------------------------------------------------------|----------|
| <b>Media working volume</b>                                               | 3 mL     |
| <b>Plating density (total cells)</b>                                      | 5.00E+05 |
| <b>Total DNA amount</b>                                                   | 2 µg     |
| <b>Plasmid ratio<br/>(pHelper:pAAV2/2:pGFP)</b>                           | 1:1:1    |
| <b>PEI:DNA</b>                                                            | 1:1      |
| <b>Cocktail volume</b>                                                    | 300 µL   |

|                        |         |
|------------------------|---------|
| <b>Incubation time</b> | 15 min  |
| <b>Cocktail media</b>  | OptiMEM |

**Supplementary Table S4.** Transfection parameters for high-producing condition

| <b>6 well plate transfection conditions<br/>(high producing condition)</b> |          |
|----------------------------------------------------------------------------|----------|
| <b>Media working volume</b>                                                | 2 mL     |
| <b>Plating density (total cells)</b>                                       | 5.00E+05 |
| <b>Total DNA amount</b>                                                    | 4 µg     |
| <b>Plasmid ratio<br/>(pHelper:pAAV2/2:pGFP)</b>                            | 2:1.5:1  |
| <b>PEI:DNA</b>                                                             | 1:1      |
| <b>Cocktail volume</b>                                                     | 200 µL   |
| <b>Incubation time</b>                                                     | 15 min   |
| <b>Cocktail media</b>                                                      | OptiMEM  |

**Supplementary Table S5.** Viable cell density (VCD) and cell viability for AAV2 high-producing condition in 293T cells

|               | <b>Sample</b> | <b>VCD</b> | <b>Viability</b> |
|---------------|---------------|------------|------------------|
| <i>BCL2</i>   | 1             | 1.44E+06   | 87.30%           |
|               | 2             | 1.64E+06   | 90.10%           |
|               | 3             | 1.64E+06   | 84.60%           |
| <i>XBPI</i>   | 1             | 1.53E+06   | 88.00%           |
|               | 2             | 1.72E+06   | 90.20%           |
|               | 3             | 9.60E+05   | 88.70%           |
| <i>HSPA6</i>  | 1             | 1.48E+06   | 90.40%           |
|               | 2             | 1.38E+06   | 89.80%           |
|               | 3             | 9.57E+05   | 89.70%           |
| <i>GADD34</i> | 1             | 1.98E+06   | 89.90%           |
|               | 2             | 1.76E+06   | 86.50%           |
|               | 3             | 1.34E+06   | 89.20%           |

|          |   |           |        |
|----------|---|-----------|--------|
| Parental | 1 | 1.80E+06  | 87.30% |
|          | 2 | 2.18E+06  | 88.60% |
|          | 3 | * missing | N/A    |

Note: N/A: \* Samples for VCD and viability evaluation were missing, so no results can be shown here.

**Supplementary Table S6.** Viable cell density (VCD) and cell viability for AAV8 high-producing condition in 293T cells

|               | Sample | VCD      | Viability |
|---------------|--------|----------|-----------|
| <i>BCL2</i>   | 1      | 1.74E+06 | 91.40%    |
|               | 2      | 1.52E+06 | 86.80%    |
|               | 3      | 1.55E+06 | 93.00%    |
| <i>XBPI</i>   | 1      | 9.77E+05 | 97.70%    |
|               | 2      | 9.21E+05 | 92.10%    |
|               | 3      | 8.61E+05 | 86.10%    |
| <i>HSPA6</i>  | 1      | 1.04E+06 | 96.20%    |
|               | 2      | 1.18E+06 | 92.70%    |
|               | 3      | 9.29E+05 | 92.00%    |
| <i>GADD34</i> | 1      | 1.23E+06 | 90.90%    |
|               | 2      | 1.23E+06 | 90.20%    |
|               | 3      | 1.01E+06 | 91.50%    |
| Parental      | 1      | 1.04E+06 | 67.00%    |
|               | 2      | 9.00E+05 | 70.80%    |
|               | 3      | 1.88E+06 | 92.80%    |

**Supplementary Table S7.** Viable cell density (VCD) and cell viability for AAV2 high-producing condition in HEK293 cells

|             | Sample | VCD      | Viability |
|-------------|--------|----------|-----------|
| <i>BCL2</i> | 1      | 9.53E+05 | 85.90%    |

|                          |   |              |        |
|--------------------------|---|--------------|--------|
|                          | 2 | 1.12E+0<br>6 | 95.50% |
|                          | 3 | 8.14E+0<br>5 | 92.10% |
| <i>XBP1</i>              | 1 | 1.16E+0<br>6 | 86.90% |
|                          | 2 | 1.37E+0<br>6 | 88.10% |
|                          | 3 | 1.51E+0<br>6 | 87.50% |
| <i>HSPA6</i>             | 1 | 1.79E+0<br>6 | 92.50% |
|                          | 2 | 1.34E+0<br>6 | 93.10% |
|                          | 3 | 1.94E+0<br>6 | 97.70% |
| <i>GADD3</i><br><i>4</i> | 1 | 1.28E+0<br>6 | 88.70% |
|                          | 2 | 1.39E+0<br>6 | 94.40% |
|                          | 3 | 1.42E+0<br>6 | 93.80% |
| Parental                 | 1 | 1.63E+0<br>6 | 87.50% |
|                          | 2 | 1.07E+0<br>6 | 88.90% |
|                          | 3 | 2.11E+0<br>6 | 95.00% |

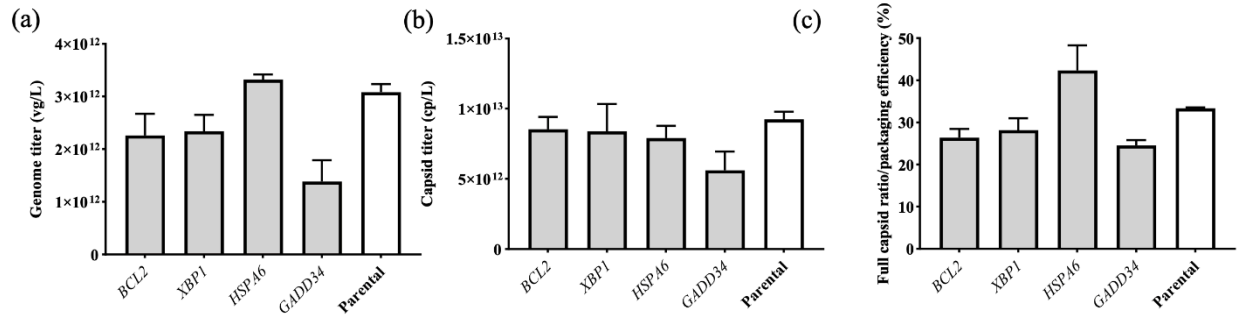

**Supplementary Figure S1.** Triple plasmid transient transfection for AAV2 production in HEK293T cells under low producing condition for both overexpressed stable pools and parental cells. Genome titers were evaluated for each condition. The error bars represent the biological duplicates. (a) Genome titer in vg/L. (b) Capsid titer in cp/L. (c) Packaging efficiency.

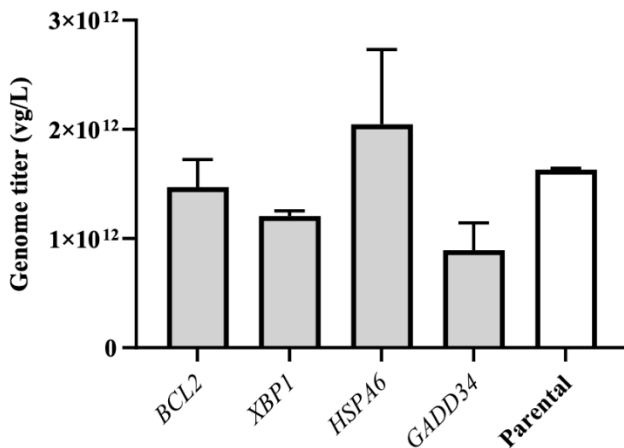

**Supplementary Figure S2.** Triple plasmid transient transfection for AAV2 production in HEK293 cells under low producing condition for both overexpressed stable pools and parental cells. Genome titers were evaluated for each condition at harvest. The error bars represent biological duplicates.
